# Supplementary material
Source: HighWire-hosted journal article supplement (https://www.cmajopen.ca/highwire/filestream/81206/field_highwire_adjunct_files/1/2018-0091-2-at.pdf)
Supplement: 2018-0091-2-at.pdf [file 2018-0091-2-at.pdf]

Appendix 2 (as supplied by the authors): Types of targeted, disease-specific chronic disease prevention and management programming delivered at PHC site by urban/rural status, n (%).

|                           | Arthritis<br>n=139 | Asthma<br>n=139 | Autism<br>n=138 | Cancer<br>n=137 | Cardiac Rehab<br>n=138 | CVD<br>n=139 | Crohn's/<br>Colitis<br>n=136 | Chronic<br>Pain<br>n=139 |
|---------------------------|--------------------|-----------------|-----------------|-----------------|------------------------|--------------|------------------------------|--------------------------|
| Delivered                 | 20 (14.4)          | 23 (16.5)       | 37 (26.8)       | 31 (22.6)       | 24 (17.4)              | 30 (21.6)    | 19 (14.0)                    | 26 (18.7)                |
| Urban                     | 5 (15.2)           | 8 (24.2)        | 6 (18.2)        | 8 (25.0)        | 5 (15.6)               | 8 (24.2)     | 6 (18.8)                     | 8 (24.2)                 |
| Rural                     | 15 (14.2)          | 15 (14.2)       | 31 (29.5)       | 23 (21.9)       | 19 (17.9)              | 22 (20.8)    | 13 (12.5)                    | 18 (17.0)                |
| Delivered by visiting HCP | 4 (20.0)           | 5 (21.7)        | 16 (43.2)       | 7 (22.6)        | 3 (12.5)               | 5 (16.7)     | 3 (15.8)                     | 5 (19.2)                 |
| Urban                     | 0 (0.0)            | 1 (12.5)        | 2 (33.3)        | 1 (12.5)        | 0 (0.0)                | 0 (0.0)      | 0 (0.0)                      | 1 (12.5)                 |
| Rural                     | 4 (26.7)           | 4 (26.7)        | 14 (45.2)       | 6 (26.1)        | 3 (15.8)               | 5 (22.7)     | 3 (23.1)                     | 4 (22.2)                 |
| On-site delivery          | 17 (85.0)          | 19 (82.6)       | 24 (64.9)       | 27 (87.1)       | 22 (91.7)              | 26 (86.7)    | 16 (84.2)                    | 22 (84.6)                |
| Urban                     | 5 (100.0)          | 7 (87.5)        | 5 (83.3)        | 7 (87.5)        | 5 (100.0)              | 8 (100.0)    | 6 (100.0)                    | 7 (87.5)                 |
| Rural                     | 12 (80.0)          | 12 (80.0)       | 19 (61.3)       | 20 (87.0)       | 17 (89.5)              | 18 (81.8)    | 10 (76.9)                    | 15 (83.3)                |
| Unsure                    | 4 (2.9)            | 3 (2.2)         | 5 (3.6)         | 2 (1.5)         | 5 (3.6)                | 3 (2.2)      | 3 (2.2)                      | 2 (1.4)                  |

|                           | Congestive Heart<br>Failure<br>n=139 | COPD<br>n=139 | Cystic Fibrosis<br>n=136 | Dev. Delay<br>n=134 | Diabetes<br>n=138 | Eating Disorders<br>n=136 | Epilepsy<br>n=137 | Bleeding<br>Disorders<br>n=137 |
|---------------------------|--------------------------------------|---------------|--------------------------|---------------------|-------------------|---------------------------|-------------------|--------------------------------|
| Delivered                 | 31 (22.3)                            | 33 (23.7)     | 12 (8.8)                 | 29 (21.6)           | 63 (45.7)         | 27 (19.9)                 | 17 (12.4)         | 14 (10.2)                      |
| Urban                     | 7 (21.9)                             | 7 (21.9)      | 5 (15.6)                 | 5 (16.1)            | 13 (40.6)         | 6 (19.4)                  | 5 (15.6)          | 3 (9.4)                        |
| Rural                     | 24 (22.4)                            | 26 (24.3)     | 7 (6.7)                  | 24 (23.3)           | 50 (47.2)         | 21 (20.0)                 | 12 (11.4)         | 11 (10.5)                      |
| Delivered by visiting HCP | 7 (22.6)                             | 7 (21.2)      | 2 (16.7)                 | 12 (41.4)           | 18 (28.6)         | 4 (14.8)                  | 4 (23.5)          | 6 (42.9)                       |
| Urban                     | 0 (0.0)                              | 0 (0.0)       | 0 (0.0)                  | 1 (20.0)            | 4 (30.8)          | 0 (0.0)                   | 1 (20.0)          | 1 (33.3)                       |
| Rural                     | 7 (29.2)                             | 7 (26.9)      | 2 (28.6)                 | 11 (45.8)           | 14 (28.0)         | 4 (19.0)                  | 3 (25.0)          | 5 (45.5)                       |
| On-site delivery          | 26 (83.9)                            | 27 (81.8)     | 10 (83.3)                | 18 (62.1)           | 53 (84.1)         | 23 (85.2)                 | 14 (82.3)         | 8 (57.1)                       |
| Urban                     | 7 (100.0)                            | 7 (100.0)     | 5 (100.0)                | 4 (80.0)            | 9 (69.2)          | 6 (100.0)                 | 4 (80.0)          | 2 (66.7)                       |
| Rural                     | 19 (79.2)                            | 20 (76.9)     | 5 (71.4)                 | 14 (58.3)           | 44 (88.0)         | 17 (81.0)                 | 10 (83.3)         | 6 (54.5)                       |
| Unsure                    | 1 (0.7)                              | 1 (0.7)       | 4 (2.9)                  | 6 (4.5)             | 2 (1.4)           | 3 (2.2)                   | 4 (2.9)           | 5 (3.6)                        |

\* p ≤ .05

|                           | HIV<br>n=137 | Hypertension<br>n=136 | Kidney Disease<br>n=136 | Pulmonary Rehab<br>n=137 | Stroke<br>n=137 |
|---------------------------|--------------|-----------------------|-------------------------|--------------------------|-----------------|
| Delivered                 | 21 (15.3)    | 34 (25.0)             | 26 (19.1)               | 15 (10.9)                | 24 (17.5)       |
| Urban                     | 8 (25.0)     | 8 (25.8)              | 6 (18.8)                | 6 (18.8)                 | 7 (21.9)        |
| Rural                     | 13 (12.4)    | 26 (24.8)             | 20 (19.2)               | 9 (8.6)                  | 17 (16.2)       |
| Delivered by visiting HCP | 7 (33.3)     | 8 (23.5)              | 10 (38.5)               | 4 (26.7)                 | 3 (12.5)        |
| Urban                     | 2 (25.0)     | 2 (25.0)              | 1 (16.7)                | 1 (16.7)                 | 0 (0.0)         |
| Rural                     | 5 (38.5)     | 6 (23.1)              | 9 (45.0)                | 3 (33.3)                 | 3 (17.6)        |
| On-site delivery          | 16 (76.2)    | 28 (82.4)             | 19 (73.1)               | 13 (86.7)                | 22 (91.7)       |
| Urban                     | 6 (75.0)     | 6 (75.0)              | 5 (83.3)                | 5 (83.3)                 | 7 (100.0)       |

Buote R, Asghari S, Aubrey-Bassler K, et al. Primary health care services for patients with chronic disease in Newfoundland and Labrador: a descriptive analysis. *CMAJ Open* 2018. DOI:10.9778/cmajo.20180091.

Copyright © 2019 Joule Inc. and its licensors

|        |           |           |           |          |           |
|--------|-----------|-----------|-----------|----------|-----------|
| Rural  | 10 (76.9) | 22 (84.6) | 14 (70.0) | 8 (88.9) | 15 (88.2) |
| Unsure | 5 (3.6)   | 2 (1.5)   | 2 (1.5)   | 3 (2.2)  | 2 (1.5)   |

---
